# Supplementary material for: Exercise-Induced Muscle Damage and Protein Intake: A Bibliometric and Visual Analysis
Source: MDPI journal article supplement (doi:10.3390/nu14204288), 2022-10-14
Supplement: s1 [file s1]

Table S1. Search strategy and results

| Set | Results   | WoSCC Search Strategies                    |
|-----|-----------|--------------------------------------------|
| #1  | 1,019     | TOPIC = ("DOMS")                           |
| #2  | 858       | TOPIC = ("delayed onset muscle soreness")  |
| #3  | 244       | TOPIC = ("EIMD")                           |
| #4  | 803       | TOPIC = ("exercise-induced muscle damage") |
| #5  | 2,819,535 | TOPIC = ("protein*")                       |
| #6  | 7,035     | TOPIC = ("protein* intake")                |
| #7  | 407       | TOPIC = ("protein* ingestion")             |
| #8  | 2043      | #1 OR #2 OR #3 OR #4                       |
| #9  | 2,593,838 | #5 OR #6 OR #7                             |
| #10 | 351       | #8 AND #9                                  |

Note: Indexes (SCI-Expanded; SSCI; A&HCI; CPCI-S; CPCI-SSH; ESCI; CCR-Expanded; IC); Language (English); Timespan (1975–2022).

Table S2. Key concepts in bibliometrics and in network analysis

| Term                   | Explanation                                                                                                                                                                                                                                                                                                                                    |
|------------------------|------------------------------------------------------------------------------------------------------------------------------------------------------------------------------------------------------------------------------------------------------------------------------------------------------------------------------------------------|
| Key concepts           |                                                                                                                                                                                                                                                                                                                                                |
| Bibliometric           | It enables researchers to see how pieces of evidence are connected, revealing the structure and development of a field                                                                                                                                                                                                                         |
| Systematic mapping     | It provides a snapshot of the current state of knowledge in the scientific literature, identifying areas needing more research attention and those ready for full synthesis                                                                                                                                                                    |
| Intellectual structure | It refers to a set of salient attributes of the knowledge base that can provide an organized and holistic understanding of the chosen scientific domain                                                                                                                                                                                        |
| Performance analysis   | It quantifies citation impacts and productivity using several metrics, such as publication-related metrics (total publication, number of co-authors.), citation-related metrics (total citation, average citation), and citation and publication -related metrics (g-index, number of cited papers)                                            |
| Collaboration networks | They are defined as a set of individuals who come together and collaborate on particular tasks such as publishing a paper                                                                                                                                                                                                                      |
| Key metrics            |                                                                                                                                                                                                                                                                                                                                                |
| Betweenness centrality | The algorithm calculates unweighted shortest paths between all pairs of nodes in a graph. Each node receives a score, based on the number of shortest paths that pass through the node                                                                                                                                                         |
| Burstness analysis     | Citation burst is a detection of a burst event. A citation burst provides evidence that a particular publication is associated with a surge of citations. Furthermore, if a cluster contains numerous nodes with strong citation bursts, then the cluster as a whole capture an active area of research, or an emerging trend.                 |
| Modularity scores      | Modularity is a measure of the structure of a graph, measuring the density of connections within a module. Graphs with a high modularity score will have many connections within a module but only few pointing outwards to other modules. Its value ranges from 0 to 1.                                                                       |
| Silhouette scores      | Silhouette score is a metric used to calculate the goodness of a clustering technique. Its value ranges from – 1 to 1.<br>1: clusters are isolated from each other.<br>0: clusters are indifferent, or we can say that the distance between clusters is not significant.<br>-1: clusters are assigned in the wrong way.                        |
| Centrality divergence  | The centrality divergence metric measures the structural variation caused by an article a in terms of the divergence of the distribution of betweenness centrality CB of nodes $v_i$ in the baseline network. The centrality divergence metric is potentially valuable for detecting boundary-spanning activities at interdisciplinary levels. |
| Modularity divergence  | The modularity of a network is a measure of the overall structure of the network. Its range is between – 1 and 1. The modularity change rate of a scientific paper measures the relative structural change due to the information from the published paper with reference to a baseline network.                                               |
